# Supplementary material for: Juxtaposition of Bub1 and Cdc20 on phosphorylated Mad1 during catalytic mitotic checkpoint complex assembly
Source: PubMed Central journal article supplement (PMC9605988; doi:10.1038/s41467-022-34058-2), 2022-10-26
Supplement: 41467_2022_34058_MOESM3_ESM.pdf [file 41467_2022_34058_MOESM3_ESM.pdf]

## Description of Additional Supplementary Files

### File name: Supplementary Data 1

**Description:** PDB coordinates for the model of pBub1:Cdc20:pMad1:C-Mad2:O-Mad2 complex (MCC-assembly scaffold) posed for MCC formation. The model was generated using PDBs 1GO4, 2V64, 6TLJ, 7B1F<sup>21,23,26,90</sup> and the AlphaFold2 models of Bub1<sup>448-534</sup>:Mad1<sup>CTD</sup>:Cdc20 and the folded model of Mad1<sup>485-718</sup>.

### File name: Supplementary Movie 1

**Description:** Rocking movie of the MCCassembly scaffold model shown in main text Figure 7C.
